# Supplementary material
Source: PubMed Central journal article supplement (PMC6223561)
Supplement: jcsm.14.11.1929s1.pdf [file jcsm.14.11.1929s1.pdf]

**Table S1.** Three-way interaction of sex, smoking status and sleep disordered breathing by clinical cutoffs for risk of incident cardiovascular disease.

| <u>Main Effects</u>                   | Model 1 (n=3852)        |                          | Model 2 (n=3852)        |                          | Model 3 (n=4214)        |                         | Model 4 (n=3852)         |
|---------------------------------------|-------------------------|--------------------------|-------------------------|--------------------------|-------------------------|-------------------------|--------------------------|
|                                       | Unadjusted              | Adjusted                 | Unadjusted              | Adjusted                 | Unadjusted              | Adjusted                | Adjusted <sup>‡</sup>    |
| <b>Sex</b>                            | HR (95% CI)             | HR (95% CI)              | HR (95% CI)             | HR (95% CI)              | HR (95% CI)             | HR (95% CI)             | HR (95% CI)              |
| Male Sex                              | 1.00 (ref)              | 1.00 (ref)               | 1.00 (ref)              | 1.00 (ref)               | 1.00 (ref)              | 1.00 (ref)              | 1.00 (ref)               |
| Female Sex                            | <b>0.55 (0.39-0.80)</b> | <b>0.49 (0.33-0.71)</b>  | <b>0.55 (0.38-0.79)</b> | <b>0.45 (0.31-0.66)</b>  | <b>0.56 (0.40-0.80)</b> | <b>0.49 (0.34-0.70)</b> | <b>0.46 (0.32-0.68)</b>  |
| <b>Smoking Status</b>                 |                         |                          |                         |                          |                         |                         |                          |
| Non-Smoker                            | 1.00 (ref)              | 1.00 (ref)               | 1.00 (ref)              | 1.00 (ref)               | 1.00 (ref)              | 1.00 (ref)              | 1.00 (ref)               |
| Former-Smoker                         | 1.10 (0.74-1.63)        | 0.90 (0.60-1.36)         | 1.14 (0.77-1.69)        | 0.90 (0.61-1.34)         | 1.09 (0.75-1.58)        | 0.89 (0.60-1.32)        | 0.85 (0.57-1.28)         |
| Current-Smoker                        | 1.43 (0.86-2.38)        | 1.51 (0.87-2.60)         | 1.49 (0.90-2.46)        | 1.60 (0.97-2.66)         | 1.33 (0.81-2.20)        | 1.45 (0.85-2.48)        | 1.46 (0.85-2.49)         |
| <b>Sleep Disordered Breathing</b>     |                         |                          |                         |                          |                         |                         |                          |
| No SDB (AHI <5 events/hour)           | 1.00 (ref)              | 1.00 (ref)               | 1.00 (ref)              | 1.00 (ref)               | 1.00 (ref)              | 1.00 (ref)              | 1.00 (ref)               |
| Mild SDB (AHI 5 to <15 events/hour)   | 1.17 (0.78-1.75)        | 1.02 (0.67-1.56)         | 1.22 (0.81-1.82)        | 0.98 (0.65-1.47)         | 1.12 (0.76-1.66)        | 0.94 (0.63-1.43)        | 0.91 (0.60-1.38)         |
| Mod-Sev SDB (AHI ≥15 events/hour)     | 1.35 (0.90-2.02)        | 0.88 (0.57-1.37)         | 1.45 (0.97-2.17)        | 0.91 (0.60-1.36)         | 1.32 (0.89-1.96)        | 0.86 (0.56-1.32)        | 0.79 (0.51-1.21)         |
| <b>Interactions</b>                   |                         |                          |                         |                          |                         |                         |                          |
| Female Sex*Former-Smoker              | 1.18 (0.70-2.00)        | 1.45 (0.85-2.47)         | 1.16 (0.69-1.95)        | 1.52 (0.90-2.57)         | 1.16 (0.70-1.92)        | 1.40 (0.84-2.34)        | 1.43 (0.84-2.43)         |
| Female Sex*Current-Smoker             | 0.94 (0.47-1.88)        | 0.95 (0.46-1.96)         | 0.93 (0.47-1.86)        | 0.98 (0.49-1.97)         | 0.99 (0.50-1.95)        | 1.06 (0.53-2.15)        | 1.00 (0.48-2.05)         |
| Female Sex*Mild SDB                   | 1.24 (0.73-2.10)        | 1.02 (0.60-1.74)         | 1.21 (0.71-2.06)        | 1.06 (0.62-1.80)         | 1.33 (0.80-2.22)        | 1.11 (0.66-1.87)        | 1.12 (0.66-1.91)         |
| Female Sex*Mod-Sev SDB                | 1.03 (0.57-1.87)        | 0.84 (0.45-1.57)         | 0.99 (0.55-1.79)        | 0.84 (0.46-1.53)         | 1.06 (0.60-1.89)        | 0.86 (0.47-1.57)        | 0.94 (0.51-1.73)         |
| Former-Smoker*Mild SDB                | 1.19 (0.70-2.02)        | 1.10 (0.64-1.9)          | 1.13 (0.67-1.91)        | 1.07 (0.63-1.82)         | 1.27 (0.76-2.12)        | 1.19 (0.70-2.02)        | 1.20 (0.70-2.06)         |
| Former-Smoker*Mod-Sev SDB             | 1.08 (0.63-1.85)        | 1.30 (0.74-2.28)         | 1.03 (0.60-1.76)        | 1.26 (0.73-2.16)         | 1.09 (0.65-1.84)        | 1.33 (0.77-2.29)        | 1.34 (0.77-2.33)         |
| Current-Smoker*Mild SDB               | 0.74 (0.32-1.67)        | 0.94 (0.40-2.20)         | 0.68 (0.30-1.54)        | 0.89 (0.39-2.04)         | 0.80 (0.36-1.79)        | 0.96 (0.41-2.22)        | 1.04 (0.44-2.45)         |
| Current-Smoker*Mod-Sev SDB            | 0.60 (0.23-1.54)        | 0.71 (0.28-1.84)         | 0.57 (0.22-1.46)        | 0.70 (0.27-1.79)         | 0.71 (0.29-1.73)        | 0.90 (0.36-2.24)        | 0.86 (0.33-2.27)         |
| Female Sex*Former-Smoker*Mild SDB     | 0.85 (0.40-1.82)        | 0.84 (0.39-1.80)         | 0.90 (0.42-1.92)        | 0.85 (0.40-1.82)         | 0.76 (0.36-1.57)        | 0.77 (0.37-1.6)         | 0.85 (0.39-1.82)         |
| Female Sex*Former-Smoker*Mod-SDB      | 1.13 (0.47-2.74)        | 1.14 (0.47-2.76)         | 1.14 (0.48-2.74)        | 1.08 (0.45-2.60)         | 1.05 (0.45-2.46)        | 1.03 (0.44-2.43)        | 1.21 (0.50-2.94)         |
| Female Sex*Current-Smoker*Mild SDB    | 1.96 (0.60-6.37)        | 1.56 (0.43-5.63)         | 2.20 (0.67-7.20)        | 2.01 (0.61-6.61)         | 1.85 (0.60-5.77)        | 1.45 (0.42-4.98)        | 1.31 (0.37-4.72)         |
| Female Sex*Current-Smoker*Mod-Sev SDB | 3.44 (0.86-13.74)       | <b>4.30 (1.08-17.18)</b> | 3.66 (0.92-14.49)       | <b>4.54 (1.14-18.14)</b> | 2.80 (0.77-10.21)       | 3.40 (0.92-12.52)       | <b>3.95 (1.01-15.55)</b> |

SDB-Sleep disordered breathing; AHI-Apnea Hypopnea Index; Mod-Sev-Moderate to Severe. HR-Hazard ratio. Significant hazard ratios in **bold**.

All models are three way interactions including main effects, two way, and three way interactions: *Sex + Smoking Status + Sleep Apnea Severity + Sex\*Smoking Status + Sex\*Sleep Apnea Severity + Smoking Status\*Sleep Apnea Severity + Sex\*Smoking Status\*Sleep Apnea Severity*

**Model 1:** Primary analysis with Fine-Gray regression accounting for competing risk of death from any other cause with adjusted model adjusted for age, bmi, race, systolic blood pressure, diastolic blood pressure, presence of type 2 diabetes, total cholesterol and high density lipoprotein levels.

**Model 2:** Sensitivity analysis with Cox proportional hazard regression with adjusted model adjusted for age, bmi, race, systolic blood pressure, diastolic blood pressure, presence of type 2 diabetes, total cholesterol and high density lipoprotein levels.

**Model 3:** Sensitivity analysis with Fine-Gray regression accounting for competing risk of death from any other cause with adjusted model adjusted for age, bmi, race, systolic blood pressure, diastolic blood pressure, presence of type 2 diabetes, but not lipids. This model includes 362 individuals who were only missing lipid covariate data.

**Model 4:** Sensitivity analysis with Fine-Gray regression accounting for competing risk of death from any other cause with adjusted model adjusted for age, bmi, race, presence of hypertension defined as SBP ≥140 or DBP ≥90 or use of any antihypertensive, presence of type 2 diabetes, total cholesterol and high density lipoprotein levels.

<sup>‡</sup>Unadjusted model is the same as Model 1.

**Table S1. (cont)**

| <b>Main Effects</b>                   | <b>Model 5 (n=3851)</b> |                          | <b>Model 6 (n=3,736)</b> |                          |
|---------------------------------------|-------------------------|--------------------------|--------------------------|--------------------------|
|                                       | <b>Unadjusted</b>       | <b>Adjusted</b>          | <b>Unadjusted</b>        | <b>Adjusted</b>          |
| <b>Sex</b>                            | HR (95% CI)             | HR (95% CI)              | HR (95% CI)              | HR (95% CI)              |
| Male Sex                              | 1.00 (ref)              | 1.00 (ref)               | 1.00 (ref)               | 1.00 (ref)               |
| Female Sex                            | <b>0.55 (0.39-0.79)</b> | <b>0.48 (0.33-0.70)</b>  | <b>0.54 (0.37-0.78)</b>  | <b>0.51 (0.34-0.76)</b>  |
| <b>Smoking Status</b>                 |                         |                          |                          |                          |
| Non-Smoker                            | 1.00 (ref)              | 1.00 (ref)               | 1.00 (ref)               | 1.00 (ref)               |
| Former-Smoker                         | 1.10 (0.74-1.63)        | 0.90 (0.59-1.36)         | 1.1 (0.74-1.62)          | 0.88 (0.58-1.33)         |
| Current-Smoker                        | 1.43 (0.86-2.38)        | 1.53 (0.88-2.65)         | 1.42 (0.86-2.37)         | 1.41 (0.81-2.45)         |
| <b>Sleep Disordered Breathing</b>     |                         |                          |                          |                          |
| No SDB (AHI <5 events/hour)           | 1.00 (ref)              | 1.00 (ref)               | 1.00 (ref)               | 1.00 (ref)               |
| Mild SDB (AHI 5 to <15 events/hour)   | 1.17 (0.78-1.75)        | 1.04 (0.68-1.58)         | 1.19 (0.8-1.78)          | 1.04 (0.68-1.60)         |
| Mod-Sev SDB (AHI ≥15 events/hour)     | 1.35 (0.90-2.02)        | 0.92 (0.59-1.44)         | 1.35 (0.9-2.03)          | 0.89 (0.57-1.39)         |
| <b>Interactions</b>                   |                         |                          |                          |                          |
| Female Sex*Former-Smoker              | 1.18 (0.70-1.99)        | 1.47 (0.86-2.50)         | 1.22 (0.72-2.06)         | 1.44 (0.84-2.47)         |
| Female Sex*Current-Smoker             | 0.94 (0.47-1.88)        | 0.96 (0.46-1.98)         | 1.00 (0.50-2.00)         | 0.99 (0.47-2.06)         |
| Female Sex*Mild SDB                   | 1.24 (0.73-2.11)        | 1.03 (0.60-1.77)         | 1.21 (0.71-2.06)         | 1.01 (0.59-1.74)         |
| Female Sex*Mod-Sev SDB                | 1.03 (0.57-1.87)        | 0.86 (0.46-1.60)         | 1.06 (0.58-1.93)         | 0.90 (0.48-1.67)         |
| Former-Smoker*Mild SDB                | 1.19 (0.70-2.02)        | 1.11 (0.64-1.91)         | 1.14 (0.67-1.93)         | 1.06 (0.61-1.83)         |
| Former-Smoker*Mod-Sev SDB             | 1.08 (0.63-1.85)        | 1.31 (0.74-2.30)         | 1.07 (0.62-1.84)         | 1.27 (0.72-2.25)         |
| Current-Smoker*Mild SDB               | 0.74 (0.32-1.68)        | 0.94 (0.40-2.20)         | 0.78 (0.34-1.76)         | 0.99 (0.42-2.36)         |
| Current-Smoker*Mod-Sev SDB            | 0.60 (0.23-1.55)        | 0.71 (0.27-1.81)         | 0.61 (0.24-1.56)         | 0.71 (0.27-1.83)         |
| Female Sex*Former-Smoker*Mild SDB     | 0.85 (0.40-1.82)        | 0.83 (0.38-1.77)         | 0.89 (0.41-1.92)         | 0.89 (0.41-1.93)         |
| Female Sex*Former-Smoker*Mod-SDB      | 1.13 (0.47-2.73)        | 1.13 (0.46-2.74)         | 1.03 (0.42-2.50)         | 1.11 (0.45-2.72)         |
| Female Sex*Current-Smoker*Mild SDB    | 1.96 (0.60-6.36)        | 1.52 (0.42-5.50)         | 1.67 (0.48-5.81)         | 1.34 (0.34-5.19)         |
| Female Sex*Current-Smoker*Mod-Sev SDB | 3.44 (0.86-13.71)       | <b>4.17 (1.04-16.74)</b> | 3.14 (0.79-12.56)        | <b>4.07 (1.02-16.26)</b> |

SDB-Sleep disordered breathing; AHI-Apnea Hypopnea Index; Mod-Sev-Moderate to Severe. HR-Hazard ratio. Significant hazard ratios in **bold**.

All models are three way interactions including main effects, two way, and three way interactions: *Sex + Smoking Status + Sleep Apnea Severity + Sex\*Smoking Status + Sex\*Sleep Apnea Severity + Smoking Status\*Sleep Apnea Severity + Sex\*Smoking Status\*Sleep Apnea Severity*

**Model 5:** Sensitivity analysis with Fine-Gray regression accounting for competing risk of death from any other cause with adjusted model adjusted for age, bmi, race, systolic blood pressure, diastolic blood pressure, presence of type 2 diabetes, total cholesterol and high density lipoprotein levels, nadir (minimum) oxygen saturation during sleep, and average oxygen saturation during sleep. This model excludes one subject without data regarding minimum oxygen saturation.

**Model 6:** Sensitivity analysis with Fine-Gray regression accounting for competing risk of death from any other cause with adjusted model adjusted for age, bmi, race, systolic blood pressure, diastolic blood pressure, presence of type 2 diabetes, total cholesterol and high density lipoprotein levels, and percent predicted forced expiratory volume in 1 second. This model only includes the subset of subjects with spirometry.

**Figure S1.** Average Oxygen Saturation During Sleep for Men and Women by SDB and Smoking Category

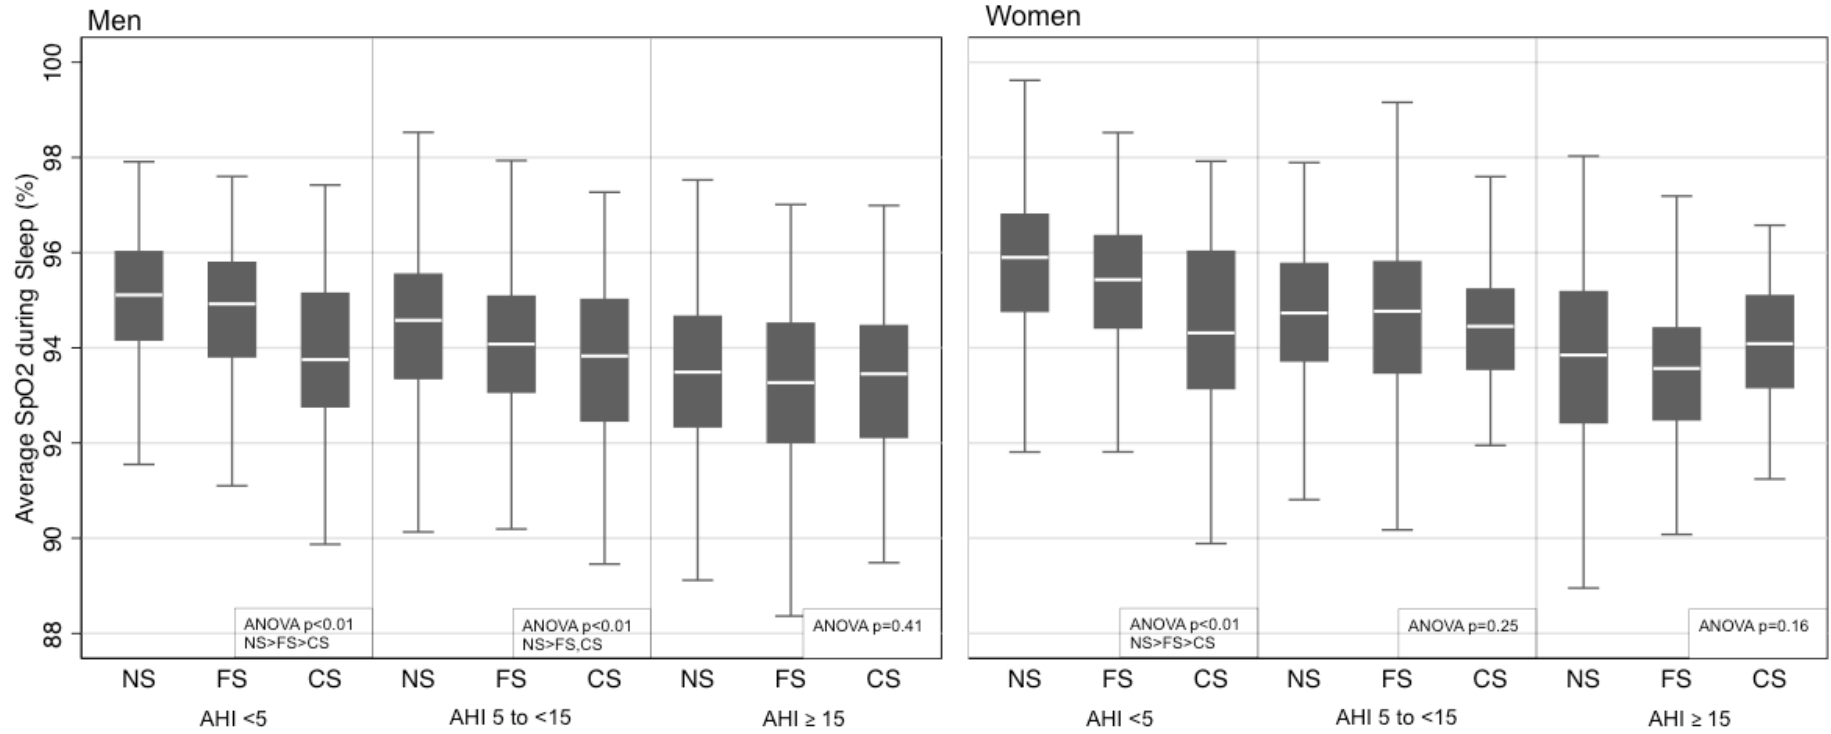

SDB-Sleep Disordered Breathing; SpO2-Oxygen Saturation; NS-Non-smoker; FS-Former Smoker, CS-Current Smoker; AHI-Apnea Hypopnea Index. Box and whisker plots for average oxygen saturation by group are each strata of AHI are presented. Differences between smoking categories compared by ANOVA with post-hoc pairwise t-tests if ANOVA  $p < 0.05$ .

**Figure S2.** Nadir Oxygen Saturation During Sleep for Men and Women by SDB and Smoking Category

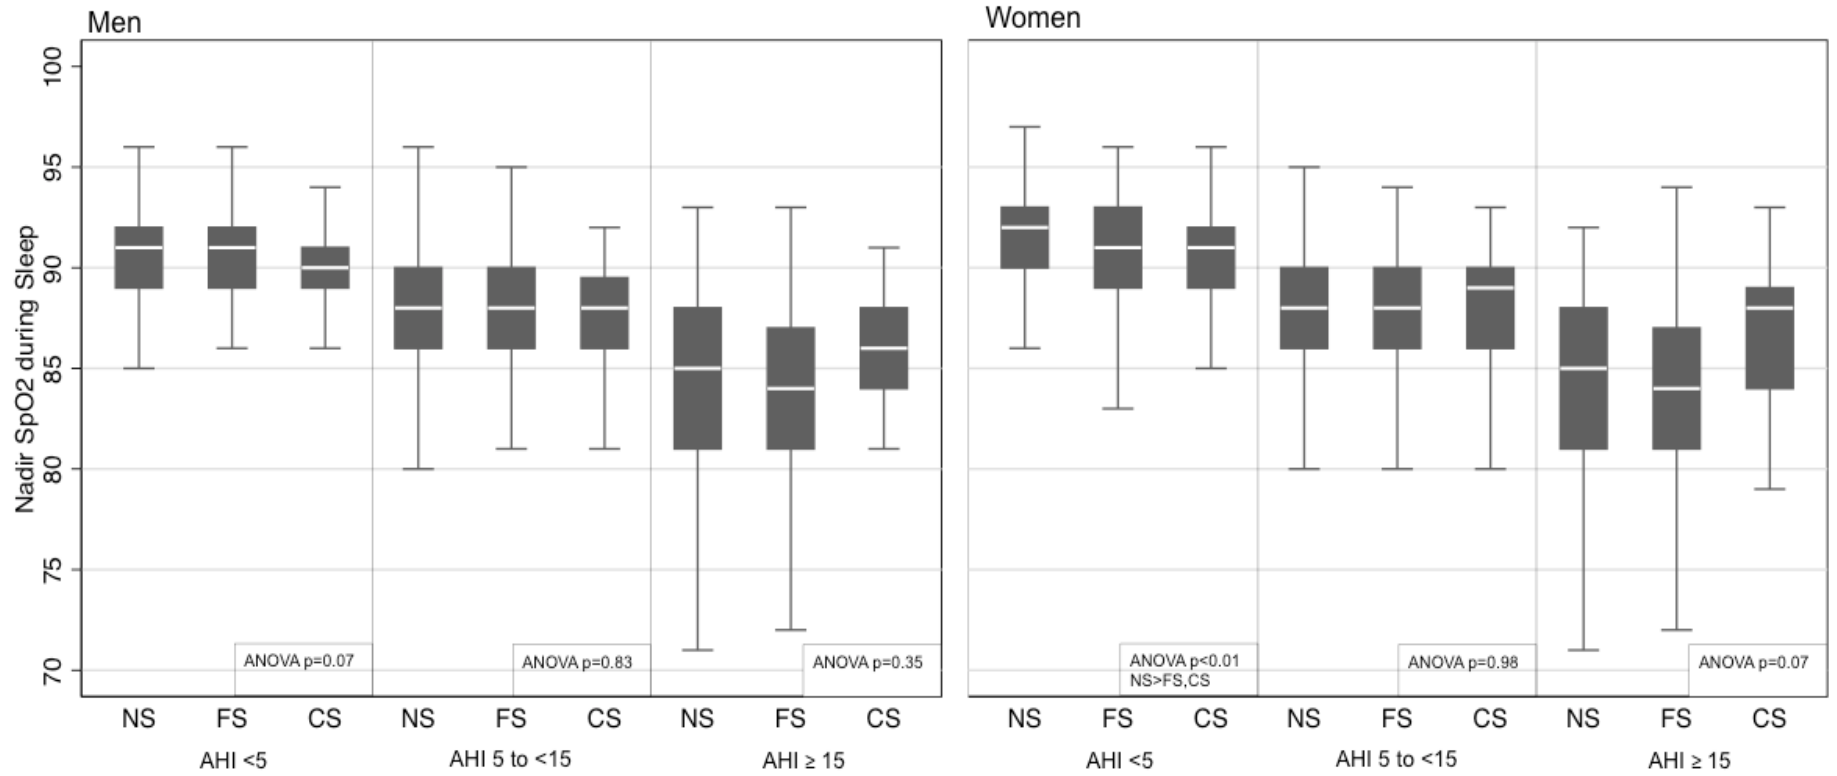

SDB-Sleep Disordered Breathing; SpO2-Oxygen Saturation; NS-Non-smoker; FS-Former Smoker, CS-Current Smoker; AHI-Apnea Hypopnea Index. Box and whisker plots for nadir oxygen saturation by group are each strata of AHI are presented. Differences between smoking categories compared by ANOVA with post-hoc pairwise t-tests if ANOVA  $p < 0.05$ .
